# Supplementary material
Source: publisher figshare collection journal article supplement (https://rs.figshare.com/ndownloader/files/17946836)
Supplement: Supplementary file 1 [file 17946836]

**Supplementary figure S3**


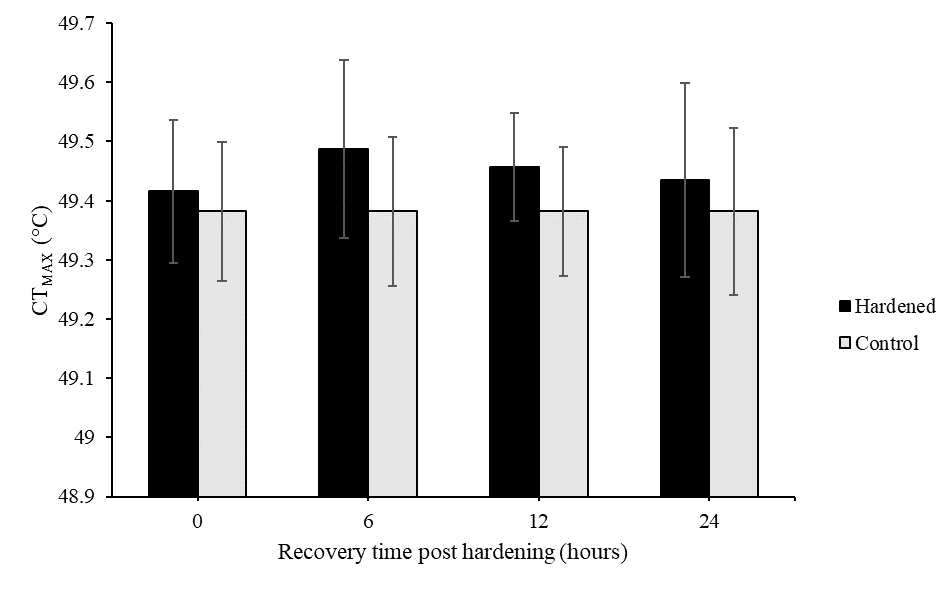


**Figure S3:** Effect of post-hardening recovery duration (0, 6, 12, and 24 hours) on mean critical thermal maximum (CTmax). Hardened individuals were exposed to 42°C for 1 hour followed by recovery periods before CTmaxwas assessed. Black bars represent corrected means of hardened samples (± SE) and grey bars represent corrected means of control samples (± SE). N = 13-15 per sample. * indicate significant differences between hardened individuals and corresponding control; * = P < 0.05, ** = P < 0.01, *** = P < 0.001.
